# Supplementary material for: Effects of Renal Impairment on the Pharmacokinetics of the Dual GIP and GLP-1 Receptor Agonist Tirzepatide
Source: PubMed Central journal article supplement — Clin Pharmacokinet. 2021 Mar 29;60(8):1049–59. doi: 10.1007/s40262-021-01012-2 (PMC8332596; doi:10.1007/s40262-021-01012-2), 2021-03-29

# Effects of renal impairment on the pharmacokinetics of dual GIP and GLP-1 receptor agonist Tirzepatide

Shweta Urva<sup>1</sup>, Tonya Quinlan<sup>1</sup>, John Landry<sup>1</sup>, Jennifer Martin<sup>1</sup>, Corina Loghin<sup>1</sup>

<sup>1</sup>Eli Lilly and Company, Lilly Corporate Center, Indianapolis, IN 46285, USA

*Correspondence and request for reprints:*

Shweta Urva, PhD

Lilly Corporate Center, Indianapolis, IN 46285

Telephone: +1 317-276-1164

Email: [urva\\_shweta@lilly.com](mailto:urva_shweta@lilly.com)

ORCID: 0000-0002-3681-479X

Short Running Title: Pharmacokinetics of tirzepatide in patients with renal impairment

Target Journal: Clinical Pharmacokinetics

Running Title (100 characters): 65 characters with spaces

Supplemental Table/Figure Count (unlimited): 3 (1 Table, 2 Figures)

**Supplemental Table 1** Subject groups based on renal impairment status

| <b>Classification</b>                  | <b>eGFR<sup>a</sup>,<br/>mL/min/1.73m<sup>2</sup></b> | <b>N<br/>(MDRD)</b> | <b>N<br/>(CKD-EPI)</b> | <b>Creatinine<br/>Clearance<sup>b</sup>,<br/>mL/min</b> | <b>N<br/>(Cockcroft-<br/>Gault)</b> |
|----------------------------------------|-------------------------------------------------------|---------------------|------------------------|---------------------------------------------------------|-------------------------------------|
| <b>Control (normal renal function)</b> | ≥90                                                   | 14                  | 15                     | ≥90                                                     | 17                                  |
| <b>Mild renal impairment</b>           | 60–89                                                 | 8                   | 7                      | 60–89                                                   | 8                                   |
| <b>Moderate renal impairment</b>       | 30–59                                                 | 8                   | 8                      | 30–59                                                   | 6                                   |
| <b>Severe renal impairment</b>         | <30 and not requiring dialysis                        | 7                   | 7                      | <30 and not requiring dialysis                          | 6                                   |
| <b>End-stage renal disease</b>         | Requiring dialysis                                    | 8                   | 8                      | Requiring dialysis                                      | 8                                   |

<sup>a</sup>Groups were classified by eGFR determined using the MDRD abbreviated equation for the primary analysis and additionally reclassified using eGFR calculated by the CKD-EPI equation for an exploratory analysis.

<sup>b</sup>Groups were reclassified using creatinine clearance determined by the Cockcroft-Gault equation for an exploratory analysis.

*CKD-EPI* Chronic Kidney Disease Epidemiology Collaboration, *eGFR* estimated glomerular filtration rate, *MDRD* Modification of Diet in Renal Disease, *N* number of subjects in each renal classification.

**Supplemental Fig. 1** Relationship between pharmacokinetic parameters of tirzepatide 5 mg and renal function calculated by CKD-EPI eGFR

$AUC_{\infty}$  area under the plasma concentration–time curve from time zero to infinity,  $AUC_{last}$  area under the plasma concentration–time curve from time zero to the time of the last measurable concentration,  $CI$  confidence interval, *CKD-EPI* Chronic Kidney Disease Epidemiology Collaboration,  $C_{max}$  maximum plasma drug concentration,  $eGFR$  estimated glomerular filtration rate, *PK* pharmacokinetics,  $R^2$  regression coefficient.

**a.**

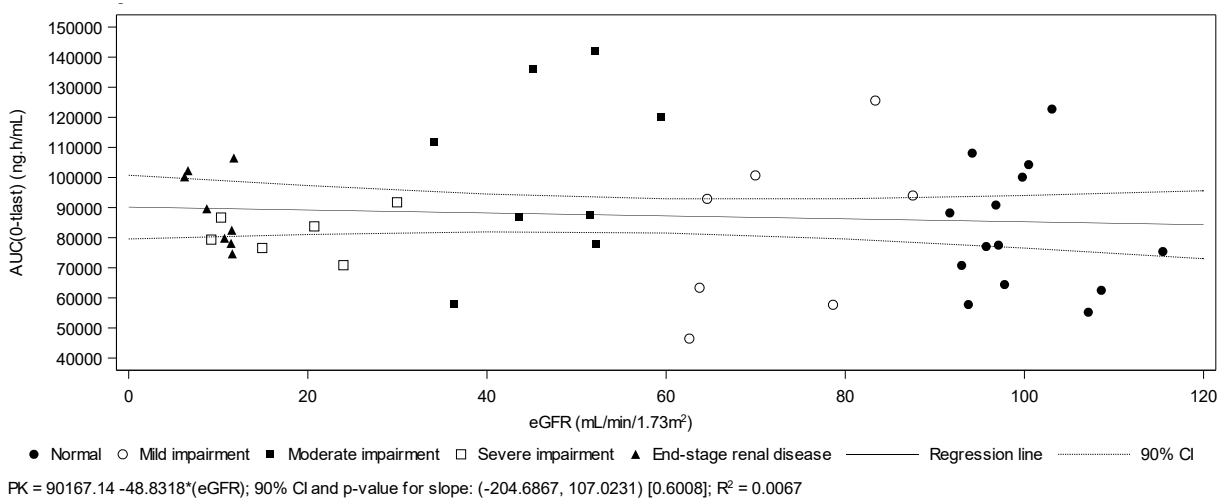

**b.**

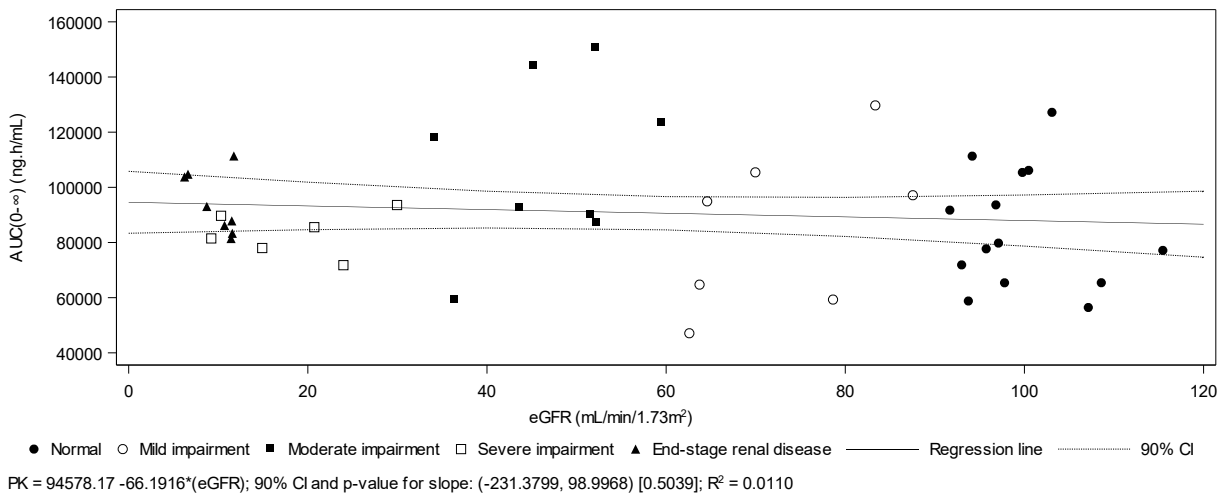

**c.**

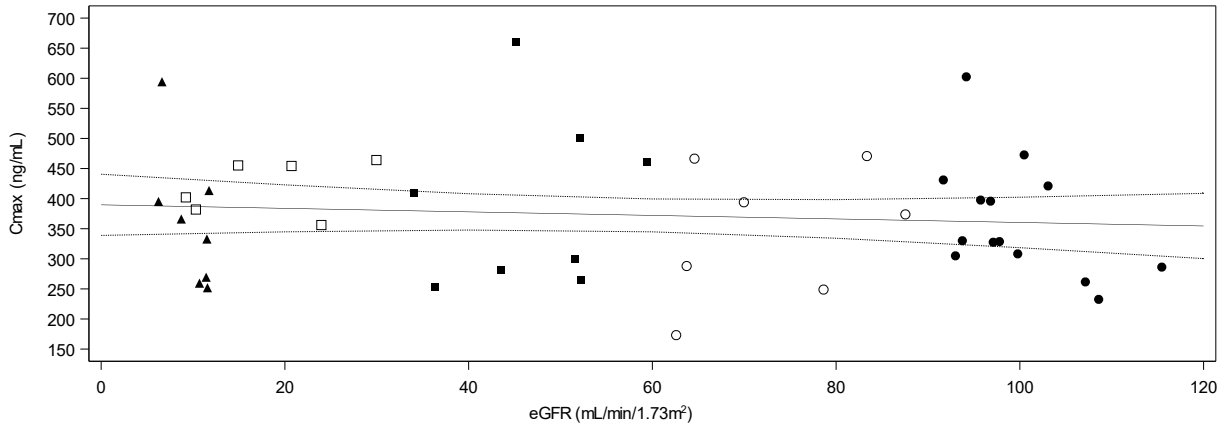

● Normal ○ Mild impairment ■ Moderate impairment □ Severe impairment ▲ End-stage renal disease — Regression line ..... 90% CI  
PK = 389.70 - 0.2930\*(eGFR); 90% CI and p-value for slope: (-1.0411, 0.4551) [0.5135]; R<sup>2</sup> = 0.0105

**Supplemental Fig. 2** Relationship between pharmacokinetic parameters of tirzepatide 5 mg and renal function calculated by creatinine clearance (Cockcroft-Gault)

$AUC_{\infty}$  area under the plasma concentration–time curve from time zero to infinity,  $AUC_{last}$  area under the plasma concentration–time curve from time zero to the time of the last measurable concentration,  $CI$  confidence interval,  $CL_{CR}$  Creatinine clearance,  $C_{max}$  maximum plasma drug concentration,  $PK$  pharmacokinetics,  $R^2$  regression coefficient.

**a.**

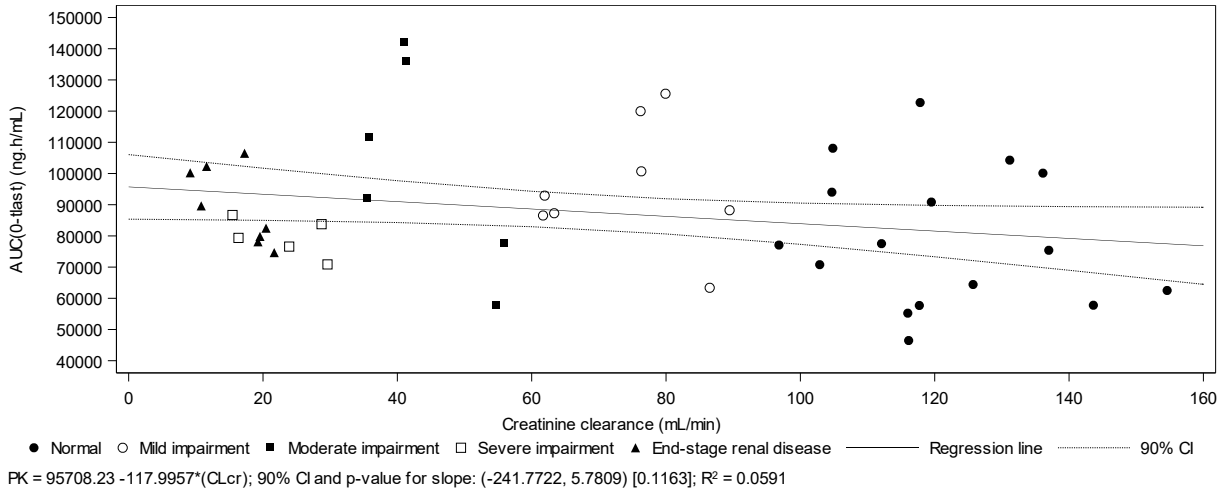

**b.**

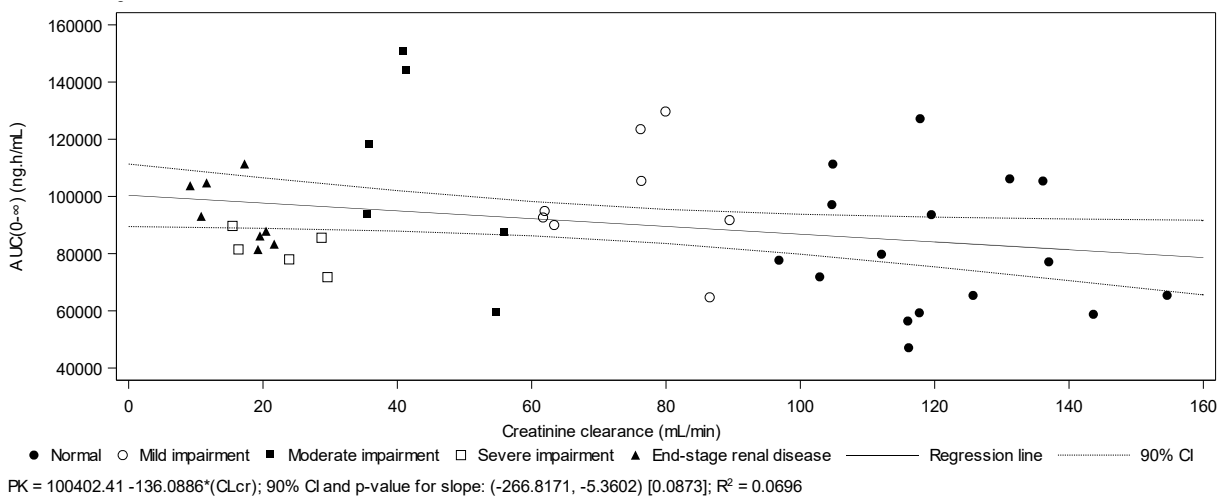

**c.**

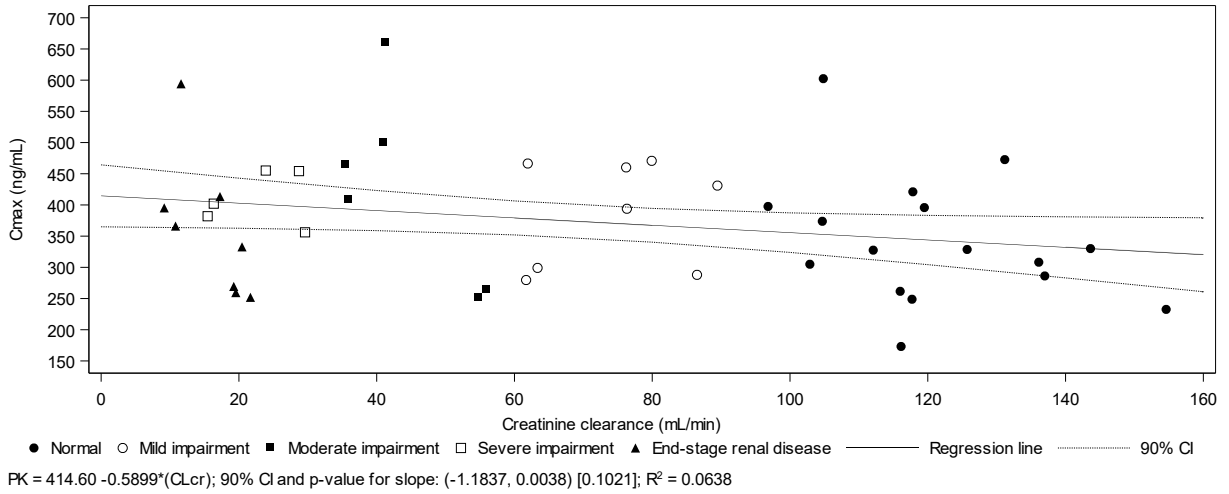

Supplement: 40262_2021_1012_MOESM1_ESM.pdf [file 40262_2021_1012_MOESM1_ESM.pdf]
